# Supplementary material for: An integrated analysis of contact tracing and genomics to assess the efficacy of travel restrictions on SARS-CoV-2 introduction and transmission in England from June to September, 2020
Source: bioRxiv or medRxiv preprint supplement (doi:10.1101/2021.03.15.21253590), 2021-03-17
Supplement: Supplementary file [file media-2.pdf]

**Funding acquisition, Leadership and supervision, Metadata curation, Project administration, Samples and logistics, Sequencing and analysis, Software and analysis tools, and Visualisation:**  
Dr Samuel C Robson <sup>13</sup>.

**Funding acquisition, Leadership and supervision, Metadata curation, Project administration, Samples and logistics, Sequencing and analysis, and Software and analysis tools:**  
Prof Nicholas J Loman <sup>41</sup>, Dr Thomas R Connor <sup>10, 69</sup>.

**Leadership and supervision, Metadata curation, Project administration, Samples and logistics, Sequencing and analysis, Software and analysis tools, and Visualisation:**  
Dr Tanya Golubchik <sup>5</sup>.

**Funding acquisition, Metadata curation, Samples and logistics, Sequencing and analysis, Software and analysis tools, and Visualisation:**  
Dr Rocio T Martinez Nunez <sup>42</sup>.

**Funding acquisition, Leadership and supervision, Metadata curation, Project administration, and Samples and logistics:**  
Dr Catherine Ludden <sup>88</sup>.

**Funding acquisition, Leadership and supervision, Metadata curation, Samples and logistics, and Sequencing and analysis:**  
Dr Sally Corden <sup>69</sup>.

**Funding acquisition, Leadership and supervision, Project administration, Samples and logistics, and Sequencing and analysis:**  
Ian Johnston <sup>99</sup> and Dr David Bonsall <sup>5</sup>.

**Funding acquisition, Leadership and supervision, Sequencing and analysis, Software and analysis tools, and Visualisation:**  
Prof Colin P Smith <sup>87</sup> and Dr Ali R Awan <sup>28</sup>.

**Funding acquisition, Samples and logistics, Sequencing and analysis, Software and analysis tools, and Visualisation:**  
Dr Giselda Bucca <sup>87</sup>.

**Leadership and supervision, Metadata curation, Project administration, Samples and logistics, and Sequencing and analysis:**  
Dr M. Estee Torok <sup>22, 101</sup>.

**Leadership and supervision, Metadata curation, Project administration, Samples and logistics, and Visualisation:**  
Dr Kordo Saeed <sup>81, 110</sup> and Dr Jacqui A Prieto <sup>83, 109</sup>.

**Leadership and supervision, Metadata curation, Project administration, Sequencing and analysis, and Software and analysis tools:**  
Dr David K Jackson <sup>99</sup>.

**Metadata curation, Project administration, Samples and logistics, Sequencing and analysis, and Software and analysis tools:**  
Dr William L Hamilton <sup>22</sup>.

**Metadata curation, Project administration, Samples and logistics, Sequencing and analysis, and Visualisation:**

Dr Luke B Snell <sup>11</sup>.

**Funding acquisition, Leadership and supervision, Metadata curation, and Samples and logistics:**

Dr Catherine Moore <sup>69</sup>.

**Funding acquisition, Leadership and supervision, Project administration, and Samples and logistics:**

Dr Ewan M Harrison <sup>99, 88</sup>.

**Leadership and supervision, Metadata curation, Project administration, and Samples and logistics:**

Dr Sonia Goncalves <sup>99</sup>.

**Leadership and supervision, Metadata curation, Samples and logistics, and Sequencing and analysis:**

Prof Ian G Goodfellow <sup>24</sup>, Dr Derek J Fairley <sup>3, 72</sup>, Prof Matthew W Loose <sup>18</sup> and Joanne Watkins <sup>69</sup>.

**Leadership and supervision, Metadata curation, Samples and logistics, and Software and analysis tools:**

Rich Livett <sup>99</sup>.

**Leadership and supervision, Metadata curation, Samples and logistics, and Visualisation:**

Dr Samuel Moses <sup>25, 106</sup>.

**Leadership and supervision, Metadata curation, Sequencing and analysis, and Software and analysis tools:**

Dr Roberto Amato <sup>99</sup>, Dr Sam Nicholls <sup>41</sup> and Dr Matthew Bull <sup>69</sup>.

**Leadership and supervision, Project administration, Samples and logistics, and Sequencing and analysis:**

Prof Darren L Smith <sup>37, 58, 105</sup>.

**Leadership and supervision, Sequencing and analysis, Software and analysis tools, and Visualisation:**

Dr Jeff Barrett <sup>99</sup> and Prof David M Aanensen <sup>14, 114</sup>.

**Metadata curation, Project administration, Samples and logistics, and Sequencing and analysis:**

Dr Martin D Curran <sup>65</sup>, Dr Surendra Parmar <sup>65</sup>, Dr Dinesh Aggarwal <sup>95, 99, 64</sup> and Dr James G Shepherd <sup>48</sup>.

**Metadata curation, Project administration, Sequencing and analysis, and Software and analysis tools:**

Dr Matthew D Parker <sup>93</sup>.

**Metadata curation, Samples and logistics, Sequencing and analysis, and Visualisation:**

Dr Sharon Glaysher <sup>61</sup>.

**Metadata curation, Sequencing and analysis, Software and analysis tools, and Visualisation:**

Dr Matthew Bashton <sup>37, 58</sup>, Dr Anthony P Underwood <sup>14, 114</sup>, Dr Nicole Pacchiarini <sup>69</sup> and Dr Katie F Loveson <sup>77</sup>.

**Project administration, Sequencing and analysis, Software and analysis tools, and Visualisation:**  
Dr Alessandro M Carabelli <sup>88</sup>.

**Funding acquisition, Leadership and supervision, and Metadata curation:**  
Dr Kate E Templeton <sup>53, 90</sup>.

**Funding acquisition, Leadership and supervision, and Project administration:**  
Dr Cordelia F Langford <sup>99</sup>, John Sillitoe <sup>99</sup>, Dr Thushan I de Silva <sup>93</sup> and Dr Dennis Wang <sup>93</sup>.

**Funding acquisition, Leadership and supervision, and Sequencing and analysis:**  
Prof Dominic Kwiatkowski <sup>99, 107</sup>, Prof Andrew Rambaut <sup>90</sup>, Dr Justin O'Grady <sup>70, 89</sup> and Dr Simon Cottrell <sup>69</sup>.

**Leadership and supervision, Metadata curation, and Sequencing and analysis:**  
Prof Matthew T.G. Holden <sup>68</sup> and Prof Emma C Thomson <sup>48</sup>.

**Leadership and supervision, Project administration, and Samples and logistics:**  
Dr Husam Osman <sup>64, 36</sup>, Dr Monique Andersson <sup>59</sup>, Prof Anoop J Chauhan <sup>61</sup> and Dr Mohammed O Hassan-Ibrahim <sup>6</sup>.

**Leadership and supervision, Project administration, and Sequencing and analysis:**  
Dr Mara Lawniczak <sup>99</sup>.

**Leadership and supervision, Samples and logistics, and Sequencing and analysis:**  
Prof Ravi Kumar Gupta <sup>88, 113</sup>, Dr Alex Alderton <sup>99</sup>, Dr Meera Chand <sup>66</sup>, Dr Chrystala Constantinidou <sup>94</sup>, Dr Meera Unnikrishnan <sup>94</sup>, Prof Alistair C Darby <sup>92</sup>, Prof Julian A Hiscox <sup>92</sup> and Prof Steve Paterson <sup>92</sup>.

**Leadership and supervision, Sequencing and analysis, and Software and analysis tools:**  
Dr Inigo Martincorena <sup>99</sup>, Prof David L Robertson <sup>48</sup>, Dr Erik M Volz <sup>39</sup>, Dr Andrew J Page <sup>70</sup> and Prof Oliver G Pybus <sup>23</sup>.

**Leadership and supervision, Sequencing and analysis, and Visualisation:**  
Dr Andrew R Bassett <sup>99</sup>.

**Metadata curation, Project administration, and Samples and logistics:**  
Dr Cristina V Ariani <sup>99</sup>, Dr Michael H Spencer Chapman <sup>99, 88</sup>, Dr Kathy K Li <sup>48</sup>, Dr Rajiv N Shah <sup>48</sup>, Dr Natasha G Jesudason <sup>48</sup> and Dr Yusri Taha <sup>50</sup>.

**Metadata curation, Project administration, and Sequencing and analysis:**  
Martin P McHugh <sup>53</sup> and Dr Rebecca Dewar <sup>53</sup>.

**Metadata curation, Samples and logistics, and Sequencing and analysis:**  
Dr Aminu S Jahun <sup>24</sup>, Dr Claire McMurray <sup>41</sup>, Ms Sarojini Pandey <sup>84</sup>, Dr James P McKenna <sup>3</sup>, Dr Andrew Nelson <sup>58, 105</sup>, Dr Gregory R Young <sup>37, 58</sup>, Dr Clare M McCann <sup>58, 105</sup> and Mr Scott Elliott <sup>61</sup>.

**Metadata curation, Samples and logistics, and Visualisation:**  
Ms Hannah Lowe <sup>25</sup>.

**Metadata curation, Sequencing and analysis, and Software and analysis tools:**  
Dr Ben Temperton <sup>91</sup>, Dr Sunando Roy <sup>82</sup>, Dr Anna Price <sup>10</sup>, Dr Sara Rey <sup>69</sup> and Mr Matthew Wyles <sup>93</sup>.

**Metadata curation, Sequencing and analysis, and Visualisation:**

Stefan Rooke<sup>90</sup> and Dr Sharif Shaaban<sup>68</sup>.

**Project administration, Samples and logistics, Sequencing and analysis:**

Dr Mariateresa de Cesare<sup>98</sup>.

**Project administration, Samples and logistics, and Software and analysis tools:**

Laura Letchford<sup>99</sup>.

**Project administration, Samples and logistics, and Visualisation:**

Miss Siona Silveira<sup>81</sup>, Dr Emanuela Pelosi<sup>81</sup> and Dr Eleri Wilson-Davies<sup>81</sup>.

**Samples and logistics, Sequencing and analysis, and Software and analysis tools:**

Dr Myra Hosmillo<sup>24</sup>.

**Sequencing and analysis, Software and analysis tools, and Visualisation:**

Áine O'Toole<sup>90</sup>, Dr Andrew R Hesketh<sup>87</sup>, Mr Richard Stark<sup>94</sup>, Dr Louis du Plessis<sup>23</sup>, Dr Chris Ruis<sup>88</sup>, Dr Helen Adams<sup>4</sup> and Dr Yann Bourgeois<sup>76</sup>.

**Funding acquisition, and Leadership and supervision:**

Dr Stephen L Mitchell<sup>91</sup>, Prof Dimitris Grammatopoulos<sup>84, 112</sup>, Dr Jonathan Edgeworth<sup>12</sup>, Prof Judith Breuer<sup>30, 82</sup>, Prof John A Todd<sup>98</sup> and Dr Christophe Fraser<sup>5</sup>.

**Funding acquisition, and Project administration:**

Dr David Buck<sup>98</sup> and Michaela John<sup>9</sup>.

**Leadership and supervision, and Metadata curation:**

Dr Gemma L Kay<sup>70</sup>.

**Leadership and supervision, and Project administration:**

Steve Palmer<sup>99</sup>, Prof Sharon J Peacock<sup>88, 64</sup> and David Heyburn<sup>69</sup>.

**Leadership and supervision, and Samples and logistics:**

Danni Weldon<sup>99</sup>, Dr Esther Robinson<sup>64, 36</sup>, Prof Alan McNally<sup>41, 86</sup>, Dr Peter Muir<sup>64</sup>, Dr Ian B Vipond<sup>64</sup>, Dr John BoYes<sup>29</sup>, Dr Venkat Sivaprakasam<sup>46</sup>, Dr Tranprit Saluja<sup>75</sup>, Dr Samir Dervisevic<sup>54</sup> and Dr Emma J Meader<sup>54</sup>.

**Leadership and supervision, and Sequencing and analysis:**

Dr Naomi R Park<sup>99</sup>, Karen Oliver<sup>99</sup>, Dr Aaron R Jeffries<sup>91</sup>, Dr Sascha Ott<sup>94</sup>, Dr Ana da Silva Filipe<sup>48</sup>, Dr David A Simpson<sup>72</sup> and Dr Chris Williams<sup>69</sup>.

**Leadership and supervision, and Visualisation:**

Dr Jane A H Masoli<sup>73, 91</sup>.

**Metadata curation, and Samples and logistics:**

Dr Bridget A Knight<sup>73, 91</sup>, Dr Christopher R Jones<sup>73, 91</sup>, Mr Cherian Koshy<sup>1</sup>, Miss Amy Ash<sup>1</sup>, Dr Anna Casey<sup>71</sup>, Dr Andrew Bosworth<sup>64, 36</sup>, Dr Liz Ratcliffe<sup>71</sup>, Dr Li Xu-McCrae<sup>36</sup>, Miss Hannah M Pymont<sup>64</sup>, Ms Stephanie Hutchings<sup>64</sup>, Dr Lisa Berry<sup>84</sup>, Ms Katie Jones<sup>84</sup>, Dr Fenella Halstead<sup>46</sup>, Mr Thomas Davis<sup>21</sup>, Dr Christopher Holmes<sup>16</sup>, Prof Miren Iturriza-Gomara<sup>92</sup>, Dr Anita O Lucaci<sup>92</sup>, Dr Paul Anthony Randell<sup>38, 104</sup>, Dr Alison Cox<sup>38, 104</sup>, Pinglawathee Madona<sup>38, 104</sup>, Dr Kathryn Ann Harris<sup>30</sup>, Dr Julianne Rose Brown<sup>30</sup>, Dr Tabitha W Mahungu<sup>74</sup>, Dr Dianne Irish-Tavares<sup>74</sup>, Dr Tanzina Haque<sup>74</sup>, Dr

Jennifer Hart <sup>74</sup>, Mr Eric Witele <sup>74</sup>, Mrs Melisa Louise Fenton <sup>75</sup>, Mr Steven Liggett <sup>79</sup>, Dr Clive Graham <sup>56</sup>, Ms Emma Swindells <sup>57</sup>, Ms Jennifer Collins <sup>50</sup>, Mr Gary Eltringham <sup>50</sup>, Ms Sharon Campbell <sup>17</sup>, Dr Patrick C McClure <sup>97</sup>, Dr Gemma Clark <sup>15</sup>, Dr Tim J Sloan <sup>60</sup>, Mr Carl Jones <sup>15</sup> and Dr Jessica Lynch <sup>2, 111</sup>.

**Metadata curation, and Sequencing and analysis:**

Dr Ben Warne <sup>8</sup>, Steven Leonard <sup>99</sup>, Jillian Durham <sup>99</sup>, Dr Thomas Williams <sup>90</sup>, Dr Sam T Haldenby <sup>92</sup>, Dr Nathaniel Storey <sup>30</sup>, Dr Nabil-Fareed Alikhan <sup>70</sup>, Dr Nadine Holmes <sup>18</sup>, Dr Christopher Moore <sup>18</sup>, Mr Matthew Carlile <sup>18</sup>, Malorie Perry <sup>69</sup>, Dr Noel Craine <sup>69</sup>, Prof Ronan A Lyons <sup>80</sup>, Miss Angela H Beckett <sup>13</sup>, Salman Goudarzi <sup>77</sup>, Christopher Fearn <sup>77</sup>, Kate Cook <sup>77</sup>, Hannah Dent <sup>77</sup> and Hannah Paul <sup>77</sup>.

**Metadata curation, and Software and analysis tools:**

Robert Davies <sup>99</sup>.

**Project administration, and Samples and logistics:**

Beth Blane <sup>88</sup>, Sophia T Girgis <sup>88</sup>, Dr Mathew A Beale <sup>99</sup>, Katherine L Bellis <sup>99, 88</sup>, Matthew J Dorman <sup>99</sup>, Eleanor Drury <sup>99</sup>, Leanne Kane <sup>99</sup>, Sally Kay <sup>99</sup>, Dr Samantha McGuigan <sup>99</sup>, Dr Rachel Nelson <sup>99</sup>, Liam Prestwood <sup>99</sup>, Dr Shavanthi Rajatileka <sup>99</sup>, Dr Rahul Batra <sup>12</sup>, Dr Rachel J Williams <sup>82</sup>, Dr Mark Kristiansen <sup>82</sup>, Dr Angie Green <sup>98</sup>, Miss Anita Justice <sup>59</sup>, Dr Adhyana I.K Mahanama <sup>81, 102</sup> and Dr Buddhini Samaraweera <sup>81, 102</sup>.

**Project administration, and Sequencing and analysis:**

Dr Nazreen F Hadjirin <sup>88</sup> and Dr Joshua Quick <sup>41</sup>.

**Project administration, and Software and analysis tools:**

Mr Radoslaw Poplawski <sup>41</sup>.

**Samples and logistics, and Sequencing and analysis:**

Leanne M Kermack <sup>88</sup>, Nicola Reynolds <sup>7</sup>, Grant Hall <sup>24</sup>, Yasmin Chaudhry <sup>24</sup>, Malte L Pinckert <sup>24</sup>, Dr Iliana Georgana <sup>24</sup>, Dr Robin J Moll <sup>99</sup>, Dr Alicia Thornton <sup>66</sup>, Dr Richard Myers <sup>66</sup>, Dr Joanne Stockton <sup>41</sup>, Miss Charlotte A Williams <sup>82</sup>, Dr Wen C Yew <sup>58</sup>, Alexander J Trotter <sup>70</sup>, Miss Amy Trebes <sup>98</sup>, Mr George MacIntyre-Cockett <sup>98</sup>, Alec Birchley <sup>69</sup>, Alexander Adams <sup>69</sup>, Amy Plimmer <sup>69</sup>, Bree Gatica-Wilcox <sup>69</sup>, Dr Caoimhe McKerr <sup>69</sup>, Ember Hilvers <sup>69</sup>, Hannah Jones <sup>69</sup>, Dr Hibo Asad <sup>69</sup>, Jason Coombes <sup>69</sup>, Johnathan M Evans <sup>69</sup>, Laia Fina <sup>69</sup>, Lauren Gilbert <sup>69</sup>, Lee Graham <sup>69</sup>, Michelle Cronin <sup>69</sup>, Sara Kumziene-SummerhaYes <sup>69</sup>, Sarah Taylor <sup>69</sup>, Sophie Jones <sup>69</sup>, Miss Danielle C Groves <sup>93</sup>, Mrs Peijun Zhang <sup>93</sup>, Miss Marta Gallis <sup>93</sup> and Miss Stavroula F Louka <sup>93</sup>.

**Samples and logistics, and Software and analysis tools:**

Dr Igor Starinskij <sup>48</sup>.

**Sequencing and analysis, and Software and analysis tools:**

Dr Chris J Illingworth <sup>47</sup>, Dr Chris Jackson <sup>47</sup>, Ms Marina Gourtovaia <sup>99</sup>, Gerry Tonkin-Hill <sup>99</sup>, Kevin Lewis <sup>99</sup>, Dr Jaime M Tovar-Corona <sup>99</sup>, Dr Keith James <sup>99</sup>, Dr Laura Baxter <sup>94</sup>, Dr Mohammad T. Alam <sup>94</sup>, Dr Richard J Orton <sup>48</sup>, Dr Joseph Hughes <sup>48</sup>, Dr Sreenu Vattipally <sup>48</sup>, Dr Manon Ragonnet-Cronin <sup>39</sup>, Dr Fabricia F. Nascimento <sup>39</sup>, Mr David Jorgensen <sup>39</sup>, Ms Olivia Boyd <sup>39</sup>, Ms Lily Geidelberg <sup>39</sup>, Dr Alex E Zarebski <sup>23</sup>, Dr Jayna Raghvani <sup>23</sup>, Dr Moritz UG Kraemer <sup>23</sup>, Joel Southgate <sup>10, 69</sup>, Dr Benjamin B Lindsey <sup>93</sup> and Mr Timothy M Freeman <sup>93</sup>.

**Software and analysis tools, and Visualisation:**

Jon-Paul Keatley <sup>99</sup>, Dr Joshua B Singer <sup>48</sup>, Leonardo de Oliveira Martins <sup>70</sup>, Dr Corin A Yeats <sup>14</sup>, Dr Khalil Abudahab <sup>14, 114</sup>, Mr Ben EW Taylor <sup>14, 114</sup> and Mirko Menegazzo <sup>14</sup>.

### **Leadership and supervision:**

Prof John Danesh<sup>99</sup>, Wendy Hogsden<sup>46</sup>, Dr Sahar Eldirdiri<sup>21</sup>, Mrs Anita Kenyon<sup>21</sup>, Dr Jenifer Mason<sup>43</sup>, Mr Trevor I Robinson<sup>43</sup>, Prof Alison Holmes<sup>38, 103</sup>, Dr James Price<sup>38, 103</sup>, Prof John A Hartley<sup>82</sup>, Dr Tanya Curran<sup>3</sup>, Dr Alison E Mather<sup>70</sup>, Dr Giri Shankar<sup>69</sup>, Dr Rachel Jones<sup>69</sup>, Dr Robin Howe<sup>69</sup> and Dr Sian Morgan<sup>9</sup>.

### **Metadata curation:**

Dr Elizabeth Wastenge<sup>53</sup>, Dr Michael R Chapman<sup>34, 88, 99</sup>, Mr Siddharth Mookerjee<sup>38, 103</sup>, Dr Rachael Stanley<sup>54</sup>, Mrs Wendy Smith<sup>15</sup>, Prof Timothy Peto<sup>59</sup>, Dr David Eyre<sup>59</sup>, Dr Derrick Crook<sup>59</sup>, Dr Gabrielle Vernet<sup>33</sup>, Dr Christine Kitchen<sup>10</sup>, Huw Gulliver<sup>10</sup>, Dr Ian Merrick<sup>10</sup>, Prof Martyn Guest<sup>10</sup>, Robert Munn<sup>10</sup>, Dr Declan T Bradley<sup>63, 72</sup>, and Dr Tim Wyatt<sup>63</sup>.

### **Project administration:**

Dr Charlotte Beaver<sup>99</sup>, Luke Foulser<sup>99</sup>, Sophie Palmer<sup>88</sup>, Carol M Churcher<sup>88</sup>, Ellena Brooks<sup>88</sup>, Kim S Smith<sup>88</sup>, Dr Katerina Galai<sup>88</sup>, Georgina M McManus<sup>88</sup>, Dr Frances Bolt<sup>38, 103</sup>, Dr Frances Coll<sup>19</sup>, Lizzie Meadows<sup>70</sup>, Dr Stephen W Attwood<sup>23</sup>, Dr Alisha Davies<sup>69</sup>, Elen De Lacy<sup>69</sup>, Fatima Downing<sup>69</sup>, Sue Edwards<sup>69</sup>, Dr Garry P Scarlett<sup>76</sup>, Mrs Sarah Jeremiah<sup>83</sup> and Dr Nikki Smith<sup>93</sup>.

### **Samples and logistics:**

Danielle Leek<sup>88</sup>, Sushmita Sridhar<sup>88, 99</sup>, Sally Forrest<sup>88</sup>, Claire Cormie<sup>88</sup>, Harmeet K Gill<sup>88</sup>, Joana Dias<sup>88</sup>, Ellen E Higginson<sup>88</sup>, Mailis Maes<sup>88</sup>, Jamie Young<sup>88</sup>, Michelle Wantoch<sup>7</sup>, Sanger Covid Team ([www.sanger.ac.uk/covid-team](http://www.sanger.ac.uk/covid-team))<sup>99</sup>, Dorota Jamrozny<sup>99</sup>, Stephanie Lo<sup>99</sup>, Dr Minal Patel<sup>99</sup>, Verity Hill<sup>90</sup>, Ms Claire M Bewshea<sup>91</sup>, Prof Sian Ellard<sup>73, 91</sup>, Dr Cressida Auckland<sup>73</sup>, Dr Ian Harrison<sup>66</sup>, Dr Chloe Bishop<sup>66</sup>, Dr Vicki Chalker<sup>66</sup>, Dr Alex Richter<sup>85</sup>, Dr Andrew Beggs<sup>85</sup>, Dr Angus Best<sup>86</sup>, Dr Benita Percival<sup>86</sup>, Dr Jeremy Mirza<sup>86</sup>, Dr Oliver Megram<sup>86</sup>, Dr Megan Mayhew<sup>86</sup>, Dr Liam Crawford<sup>86</sup>, Dr Fiona Ashcroft<sup>86</sup>, Dr Emma Moles-Garcia<sup>86</sup>, Dr Nicola Cumley<sup>86</sup>, Mr Richard Hopes<sup>64</sup>, Dr Patawee Asamaphan<sup>48</sup>, Mr Marc O Niebel<sup>48</sup>, Prof Rory N Gunson<sup>100</sup>, Dr Amanda Bradley<sup>52</sup>, Dr Alasdair Maclean<sup>52</sup>, Dr Guy Mollett<sup>52</sup>, Dr Rachel Blacow<sup>52</sup>, Mr Paul Bird<sup>16</sup>, Mr Thomas Helmer<sup>16</sup>, Miss Karlie Fallon<sup>16</sup>, Dr Julian Tang<sup>16</sup>, Dr Antony D Hale<sup>49</sup>, Dr Louissa R Macfarlane-Smith<sup>49</sup>, Katherine L Harper<sup>49</sup>, Miss Holli Carden<sup>49</sup>, Dr Nicholas W Machin<sup>45, 64</sup>, Ms Kathryn A Jackson<sup>92</sup>, Dr Shazaad S Y Ahmad<sup>45, 64</sup>, Dr Ryan P George<sup>45</sup>, Dr Lance Turtle<sup>92</sup>, Mrs Elaine O'Toole<sup>43</sup>, Mrs Joanne Watts<sup>43</sup>, Mrs Cassie Breen<sup>43</sup>, Mrs Angela Cowell<sup>43</sup>, Ms Adela Alcolea-Medina<sup>32, 96</sup>, Ms Themoula Charalampous<sup>12, 42</sup>, Amita Patel<sup>11</sup>, Dr Lisa J Levett<sup>35</sup>, Dr Judith Heaney<sup>35</sup>, Dr Aileen Rowan<sup>39</sup>, Prof Graham P Taylor<sup>39</sup>, Dr Divya Shah<sup>30</sup>, Miss Laura Atkinson<sup>30</sup>, Mr Jack CD Lee<sup>30</sup>, Mr Adam P Westhorpe<sup>82</sup>, Dr Riaz Jannoo<sup>82</sup>, Dr Helen L Lowe<sup>82</sup>, Miss Angeliki Karamani<sup>82</sup>, Miss Leah Ensell<sup>82</sup>, Mrs Wendy Chatterton<sup>35</sup>, Miss Monika Pusok<sup>35</sup>, Mrs Ashok Dadrah<sup>75</sup>, Miss Amanda Symmonds<sup>75</sup>, Dr Graciela Sluga<sup>44</sup>, Dr Zoltan Molnar<sup>72</sup>, Mr Paul Baker<sup>79</sup>, Prof Stephen Bonner<sup>79</sup>, Ms Sarah Essex<sup>79</sup>, Dr Edward Barton<sup>56</sup>, Ms Debra Padgett<sup>56</sup>, Ms Garren Scott<sup>56</sup>, Ms Jane Greenaway<sup>57</sup>, Dr Brendan Al Payne<sup>50</sup>, Dr Shirelle Burton-Fanning<sup>50</sup>, Dr Sheila Waugh<sup>50</sup>, Dr Veena Raviprakash<sup>17</sup>, Ms Nicola Sheriff<sup>17</sup>, Ms Victoria Blakey<sup>17</sup>, Ms Lesley-Anne Williams<sup>17</sup>, Dr Jonathan Moore<sup>27</sup>, Ms Susanne Stonehouse<sup>27</sup>, Dr Louise Smith<sup>55</sup>, Dr Rose K Davidson<sup>89</sup>, Dr Luke Bedford<sup>26</sup>, Dr Lindsay Coupland<sup>54</sup>, Ms Victoria Wright<sup>18</sup>, Dr Joseph G Chappell<sup>97</sup>, Dr Theocharis Tsoleridis<sup>97</sup>, Prof Jonathan Ball<sup>97</sup>, Mrs Manjinder Khakh<sup>15</sup>, Dr Vicki M Fleming<sup>15</sup>, Dr Michelle M Lister<sup>15</sup>, Dr Hannah C Howson-Wells<sup>15</sup>, Dr Louise Berry<sup>15</sup>, Dr Tim Boswell<sup>15</sup>, Dr Amelia Joseph<sup>15</sup>, Dr Iona Willingham<sup>15</sup>, Dr Nichola Duckworth<sup>60</sup>, Dr Sarah Walsh<sup>60</sup>, Dr Emma Wise<sup>2, 111</sup>, Dr Nathan Moore<sup>2, 111</sup>, Miss Matilde Mori<sup>2, 108, 111</sup>, Dr Nick Cortes<sup>2, 111</sup>, Dr Stephen Kidd<sup>2, 111</sup>, Dr Rebecca Williams<sup>33</sup>, Laura Gifford<sup>69</sup>, Miss Kelly Bicknell<sup>61</sup>, Dr Sarah Wyllie<sup>61</sup>, Miss Allyson Lloyd<sup>61</sup>, Mr Robert Impey<sup>61</sup>, Ms Cassandra S Malone<sup>6</sup>, Mr Benjamin J Cogger<sup>6</sup>, Nick Levene<sup>62</sup>, Lynn Monaghan<sup>62</sup>, Dr Alexander J Keeley<sup>93</sup>, Dr David G Partridge<sup>78, 93</sup>, Dr Mohammad Raza<sup>78, 93</sup>, Dr Cariad Evans<sup>78, 93</sup> and Dr Kate Johnson<sup>78, 93</sup>.

### Sequencing and analysis:

Emma Betteridge<sup>99</sup>, Ben W Farr<sup>99</sup>, Scott Goodwin<sup>99</sup>, Dr Michael A Quail<sup>99</sup>, Carol Scott<sup>99</sup>, Lesley Shirley<sup>99</sup>, Scott AJ Thurston<sup>99</sup>, Diana Rajan<sup>99</sup>, Dr Iraad F Bronner<sup>99</sup>, Louise Aigrain<sup>99</sup>, Dr Nicholas M Redshaw<sup>99</sup>, Dr Stefanie V Lensing<sup>99</sup>, Shane McCarthy<sup>99</sup>, Alex Makunin<sup>99</sup>, Dr Carlos E Balcazar<sup>90</sup>, Dr Michael D Gallagher<sup>90</sup>, Dr Kathleen A Williamson<sup>90</sup>, Thomas D Stanton<sup>90</sup>, Ms Michelle L Michelsen<sup>91</sup>, Ms Joanna Warwick-Dugdale<sup>91</sup>, Dr Robin Manley<sup>91</sup>, Ms Audrey Farbos<sup>91</sup>, Dr James W Harrison<sup>91</sup>, Dr Christine M Sambles<sup>91</sup>, Dr David J Studholme<sup>91</sup>, Dr Angie Lackenby<sup>66</sup>, Dr Tamyo Mbisa<sup>66</sup>, Dr Steven Platt<sup>66</sup>, Mr Shahjahan Miah<sup>66</sup>, Dr David Bibby<sup>66</sup>, Dr Carmen Manso<sup>66</sup>, Dr Jonathan Hubb<sup>66</sup>, Dr Gavin Dabrera<sup>66</sup>, Dr Mary Ramsay<sup>66</sup>, Dr Daniel Bradshaw<sup>66</sup>, Dr Ulf Schaefer<sup>66</sup>, Dr Natalie Groves<sup>66</sup>, Dr Eileen Gallagher<sup>66</sup>, Dr David Lee<sup>66</sup>, Dr David Williams<sup>66</sup>, Dr Nicholas Ellaby<sup>66</sup>, Hassan Hartman<sup>66</sup>, Nikos Manesis<sup>66</sup>, Vineet Patel<sup>66</sup>, Juan Ledesma<sup>67</sup>, Ms Katherine A Twohig<sup>67</sup>, Dr Elias Allara<sup>64, 88</sup>, Ms Clare Pearson<sup>64, 88</sup>, Mr Jeffrey K. J. Cheng<sup>94</sup>, Dr Hannah E. Bridgewater<sup>94</sup>, Ms Lucy R. Frost<sup>94</sup>, Ms Grace Taylor-Joyce<sup>94</sup>, Dr Paul E Brown<sup>94</sup>, Dr Lily Tong<sup>48</sup>, Ms Alice Broos<sup>48</sup>, Mr Daniel Mair<sup>48</sup>, Mrs Jenna Nichols<sup>48</sup>, Dr Stephen N Carmichael<sup>48</sup>, Dr Katherine L Smollett<sup>40</sup>, Dr Kyriaki Nomikou<sup>48</sup>, Dr Elihu Aranday-Cortes<sup>48</sup>, Ms Natasha Johnson<sup>48</sup>, Dr Seema Nickbakhsh<sup>48, 68</sup>, Dr Edith E Vamos<sup>92</sup>, Dr Margaret Hughes<sup>92</sup>, Dr Lucille Rainbow<sup>92</sup>, Mr Richard Eccles<sup>92</sup>, Ms Charlotte Nelson<sup>92</sup>, Dr Mark Whitehead<sup>92</sup>, Dr Richard Gregory<sup>92</sup>, Mr Matthew Gemmell<sup>92</sup>, Ms Claudia Wierzbicki<sup>92</sup>, Ms Hermione J Webster<sup>92</sup>, Ms Chloe L Fisher<sup>28</sup>, Mr Adrian W Signell<sup>20</sup>, Dr Gilberto Betancor<sup>20</sup>, Mr Harry D Wilson<sup>20</sup>, Dr Gaia Nebbia<sup>12</sup>, Dr Flavia Flaviani<sup>31</sup>, Mr Alberto C Cerda<sup>96</sup>, Ms Tammy V Merrill<sup>96</sup>, Rebekah E Wilson<sup>96</sup>, Mr Marius Cotic<sup>82</sup>, Miss Nadua Bayzid<sup>82</sup>, Dr Thomas Thompson<sup>72</sup>, Dr Erwan Acheson<sup>72</sup>, Prof Steven Rushton<sup>51</sup>, Prof Sarah O'Brien<sup>51</sup>, David J Baker<sup>70</sup>, Steven Rudder<sup>70</sup>, Alp Aydin<sup>70</sup>, Dr Fei Sang<sup>18</sup>, Dr Johnny Debebe<sup>18</sup>, Dr Sarah Francois<sup>23</sup>, Dr Tetyana I Vasylyeva<sup>23</sup>, Dr Marina Escalera Zamudio<sup>23</sup>, Mr Bernardo Gutierrez<sup>23</sup>, Dr Angela Marchbank<sup>10</sup>, Joshua Maksimovic<sup>9</sup>, Karla Spellman<sup>9</sup>, Kathryn McCluggage<sup>9</sup>, Dr Mari Morgan<sup>69</sup>, Robert Beer<sup>9</sup>, Safiah Afifi<sup>9</sup>, Trudy Workman<sup>10</sup>, William Fuller<sup>10</sup>, Catherine Bresner<sup>10</sup>, Dr Adrienn Angyal<sup>93</sup>, Dr Luke R Green<sup>93</sup>, Dr Paul J Parsons<sup>93</sup>, Miss Rachel M Tucker<sup>93</sup>, Dr Rebecca Brown<sup>93</sup> and Mr Max Whiteley<sup>93</sup>.

### Software and analysis tools:

James Bonfield<sup>99</sup>, Dr Christoph Puethe<sup>99</sup>, Mr Andrew Whitwham<sup>99</sup>, Jennifer Liddle<sup>99</sup>, Dr Will Rowe<sup>41</sup>, Dr Igor Siveroni<sup>39</sup>, Dr Thanh Le-Viet<sup>70</sup> and Amy Gaskin<sup>69</sup>.

### Visualisation:

Dr Rob Johnson<sup>39</sup>.

**1** Barking, Havering and Redbridge University Hospitals NHS Trust, **2** Basingstoke Hospital, **3** Belfast Health & Social Care Trust, **4** Betsi Cadwaladr University Health Board, **5** Big Data Institute, Nuffield Department of Medicine, University of Oxford, **6** Brighton and Sussex University Hospitals NHS Trust, **7** Cambridge Stem Cell Institute, University of Cambridge, **8** Cambridge University Hospitals NHS Foundation Trust, **9** Cardiff and Vale University Health Board, **10** Cardiff University, **11** Centre for Clinical Infection & Diagnostics Research, St. Thomas' Hospital and Kings College London, **12** Centre for Clinical Infection and Diagnostics Research, Department of Infectious Diseases, Guy's and St Thomas' NHS Foundation Trust, **13** Centre for Enzyme Innovation, University of Portsmouth (PORT), **14** Centre for Genomic Pathogen Surveillance, University of Oxford, **15** Clinical Microbiology Department, Queens Medical Centre, **16** Clinical Microbiology, University Hospitals of Leicester NHS Trust, **17** County Durham and Darlington NHS Foundation Trust, **18** Deep Seq, School of Life Sciences, Queens Medical Centre, University of Nottingham, **19** Department of Infection Biology, Faculty of Infectious & Tropical Diseases, London School of Hygiene & Tropical Medicine, **20** Department of Infectious Diseases, King's College London, **21** Department of Microbiology, Kettering General Hospital, **22** Departments of Infectious Diseases and Microbiology, Cambridge University Hospitals NHS Foundation Trust; Cambridge, UK, **23** Department of Zoology, University of Oxford, **24** Division of Virology, Department of Pathology, University of Cambridge, **25** East Kent Hospitals University NHS Foundation Trust, **26** East Suffolk and North Essex NHS Foundation Trust, **27** Gateshead Health NHS Foundation Trust, **28** Genomics Innovation Unit, Guy's and St. Thomas' NHS Foundation Trust, **29** Gloucestershire Hospitals NHS Foundation Trust, **30** Great Ormond Street Hospital for Children NHS Foundation Trust, **31** Guy's and St. Thomas' BRC, **32** Guy's and

St. Thomas' Hospitals, **33** Hampshire Hospitals NHS Foundation Trust, **34** Health Data Research UK Cambridge, **35** Health Services Laboratories, **36** Heartlands Hospital, Birmingham, **37** Hub for Biotechnology in the Built Environment, Northumbria University, **38** Imperial College Hospitals NHS Trust, **39** Imperial College London, **40** Institute of Biodiversity, Animal Health & Comparative Medicine, **41** Institute of Microbiology and Infection, University of Birmingham, **42** King's College London, **43** Liverpool Clinical Laboratories, **44** Maidstone and Tunbridge Wells NHS Trust, **45** Manchester University NHS Foundation Trust, **46** Microbiology Department, Wye Valley NHS Trust, Hereford, **47** MRC Biostatistics Unit, University of Cambridge, **48** MRC-University of Glasgow Centre for Virus Research, **49** National Infection Service, PHE and Leeds Teaching Hospitals Trust, **50** Newcastle Hospitals NHS Foundation Trust, **51** Newcastle University, **52** NHS Greater Glasgow and Clyde, **53** NHS Lothian, **54** Norfolk and Norwich University Hospital, **55** Norfolk County Council, **56** North Cumbria Integrated Care NHS Foundation Trust, **57** North Tees and Hartlepool NHS Foundation Trust, **58** Northumbria University, **59** Oxford University Hospitals NHS Foundation Trust, **60** PathLinks, Northern Lincolnshire & Goole NHS Foundation Trust, **61** Portsmouth Hospitals University NHS Trust, **62** Princess Alexandra Hospital Microbiology Dept., **63** Public Health Agency, **64** Public Health England, **65** Public Health England, Clinical Microbiology and Public Health Laboratory, Cambridge, UK, **66** Public Health England, Colindale, **67** Public Health England, Colindale, **68** Public Health Scotland, **69** Public Health Wales NHS Trust, **70** Quadram Institute Bioscience, **71** Queen Elizabeth Hospital, **72** Queen's University Belfast, **73** Royal Devon and Exeter NHS Foundation Trust, **74** Royal Free NHS Trust, **75** Sandwell and West Birmingham NHS Trust, **76** School of Biological Sciences, University of Portsmouth (PORT), **77** School of Pharmacy and Biomedical Sciences, University of Portsmouth (PORT), **78** Sheffield Teaching Hospitals, **79** South Tees Hospitals NHS Foundation Trust, **80** Swansea University, **81** University Hospitals Southampton NHS Foundation Trust, **82** University College London, **83** University Hospital Southampton NHS Foundation Trust, **84** University Hospitals Coventry and Warwickshire, **85** University of Birmingham, **86** University of Birmingham Turnkey Laboratory, **87** University of Brighton, **88** University of Cambridge, **89** University of East Anglia, **90** University of Edinburgh, **91** University of Exeter, **92** University of Liverpool, **93** University of Sheffield, **94** University of Warwick, **95** University of Cambridge, **96** Viapath, Guy's and St Thomas' NHS Foundation Trust, and King's College Hospital NHS Foundation Trust, **97** Virology, School of Life Sciences, Queens Medical Centre, University of Nottingham, **98** Wellcome Centre for Human Genetics, Nuffield Department of Medicine, University of Oxford, **99** Wellcome Sanger Institute, **100** West of Scotland Specialist Virology Centre, NHS Greater Glasgow and Clyde, **101** Department of Medicine, University of Cambridge, **102** Ministry of Health, Sri Lanka, **103** NIHR Health Protection Research Unit in HCAI and AMR, Imperial College London, **104** North West London Pathology, **105** NU-OMICS, Northumbria University, **106** University of Kent, **107** University of Oxford, **108** University of Southampton, **109** University of Southampton School of Health Sciences, **110** University of Southampton School of Medicine, **111** University of Surrey, **112** Warwick Medical School and Institute of Precision Diagnostics, Pathology, UHCW NHS Trust, **113** Wellcome Africa Health Research Institute Durban and **114** Wellcome Genome Campus.
